# Supplementary material
Source: ML conference proceedings conference paper supplement (https://openreview.net/forum?id=TNkPBBYFkXg)
Supplement: supplementary_material [file attachment]

## A APPENDIX

The appendix contains supplementary experimental results. In Table 5 we show the ablation study of Non-IID experiments. Compared to results of IID experiments shown in Table 4, Table .5 shows the ablation study Masked CrossEntropy which is shown beneficial for balanced Non-IID data partition. In Table 6, we show the hyperparameters adopted in our experiments. In Figure 3 and 4, we show the *Fix* complexity assignments of MNIST and WikiText with iid data partition experiments. From Figure 6 to 8, we show the *Fix* complexity assignments for all balanced Non-IID data partition experiments. Figure 9 to 11, we show the learning curve of experiments with *Dyanmic* complexity assignments. The complete results for all experiments with *Dyanmic* complexity assignments can be found in Table 7, 8, and 9.

| Model | Normalization | Scaler       | Masked CrossEntropy | Accuracy Non-IID |             |             |             |
|-------|---------------|--------------|---------------------|------------------|-------------|-------------|-------------|
|       |               |              |                     | MNIST            |             | CIFAR10     |             |
|       |               |              |                     | Local            | Global      | Local       | Global      |
| a     | None          | N/A          | $\times$            | 97.4             | 97.4        | 42.6        | 42.8        |
|       | sBN           |              |                     | 99.4             | <b>99.4</b> | 53.4        | 53.7        |
|       | None          |              | $\checkmark$        | 99.7             | 95.6        | 91.7        | 58.5        |
|       | IN            |              |                     | 99.8             | 98.7        | 88.4        | 43.7        |
|       | GN            |              |                     | 99.7             | 98.3        | 91.2        | 58.2        |
| e     | LN            |              |                     | 99.8             | 98.3        | 89.9        | 54.2        |
|       | sBN           |              |                     | <b>99.9</b>      | 98.6        | <b>92.1</b> | <b>59.2</b> |
|       | None          | N/A          | $\times$            | 96.2             | 96.0        | 38.9        | 38.2        |
|       | sBN           |              |                     | 90.1             | 90.1        | 40.7        | 40.4        |
|       | None          |              | $\checkmark$        | <b>99.5</b>      | <b>96.5</b> | 86.6        | 48.9        |
| a-e   | IN            |              |                     | 98.5             | 89.8        | 83.7        | 37.0        |
|       | GN            |              |                     | 99.2             | 92.2        | 83.5        | 36.7        |
|       | LN            |              |                     | 99.3             | 94.0        | 82.6        | 40.0        |
|       | sBN           |              |                     | 99.3             | 94.2        | <b>90.1</b> | <b>52.9</b> |
| a-e   | None          | $\times$     | $\times$            | 96.8             | 96.9        | 37.8        | 37.4        |
|       | sBN           |              |                     | 99.2             | 99.2        | 41.0        | 41.3        |
|       | None          | $\times$     | $\checkmark$        | 99.4             | 95.7        | 89.1        | 52.8        |
|       | sBN           |              |                     | 99.8             | 98.0        | 90.7        | 57.7        |
|       | None          | $\checkmark$ | $\times$            | 97.3             | 97.3        | 34.6        | 34.4        |
| a-e   | sBN           |              |                     | 99.3             | <b>99.3</b> | 46.0        | 46.7        |
|       | None          |              | $\checkmark$        | 99.5             | 95.8        | 90.3        | 55.6        |
|       | IN            |              |                     | 99.8             | 98.7        | 87.0        | 34.4        |
|       | GN            |              |                     | 99.5             | 96.2        | 88.7        | 49.7        |
|       | LN            |              |                     | 99.5             | 96.2        | 78.5        | 25.0        |
|       | sBN           |              |                     | <b>99.8</b>      | 98.2        | <b>92.8</b> | <b>60.4</b> |

Table 5: Ablation Study of Non-IID scenarios. The Masked CrossEntropy is used for Non-IID experiments. It significantly improves the local performance and moderately improves global performance. Single letter model 'a' and 'e' are FedAvg equipped with various normalization methods. The sBN significantly outperforms other existing normalization methods, including InstanceNorm (IN), GroupNorm (GN) (the number of group G=4), and LayerNorm (LN). Scaler is used for HeteroFL to train models of different sizes and moderately improve the results.

| Data                 | MNIST                        | CIFAR10                  | WikiText2             |
|----------------------|------------------------------|--------------------------|-----------------------|
| Model                | CNN                          | PreResNet18              | Transformer           |
| Hidden size          | [64, 128, 256, 512]          | [64, 128, 256, 512]      | [512, 512, 512, 512]  |
| Local Epoch $E$      | 5                            | 5                        | 1                     |
| Local Batch Size $B$ | 10                           | 10                       | 100                   |
| Optimizer            |                              | SGD                      |                       |
| Momentum             |                              | 0.9                      |                       |
| Weight decay         |                              | 5.00E-04                 |                       |
| Learning rate $\eta$ | 0.01                         | 0.1                      | 0.1                   |
| Communication rounds | IID: 200<br>non-IID: 400     | 400<br>800               | 100<br>200            |
| Decay schedule (0.1) | IID: [100]<br>non-IID: [200] | [150, 250]<br>[300, 500] | [25, 50]<br>[50, 100] |
| Embedding Size       |                              |                          | 256                   |
| Number of heads      |                              | N/A                      | 8                     |
| Dropout              |                              |                          | 0.2                   |
| Sequence length      |                              |                          | 64                    |

Table 6: Hyperparameters and model architecture used in our experiments.

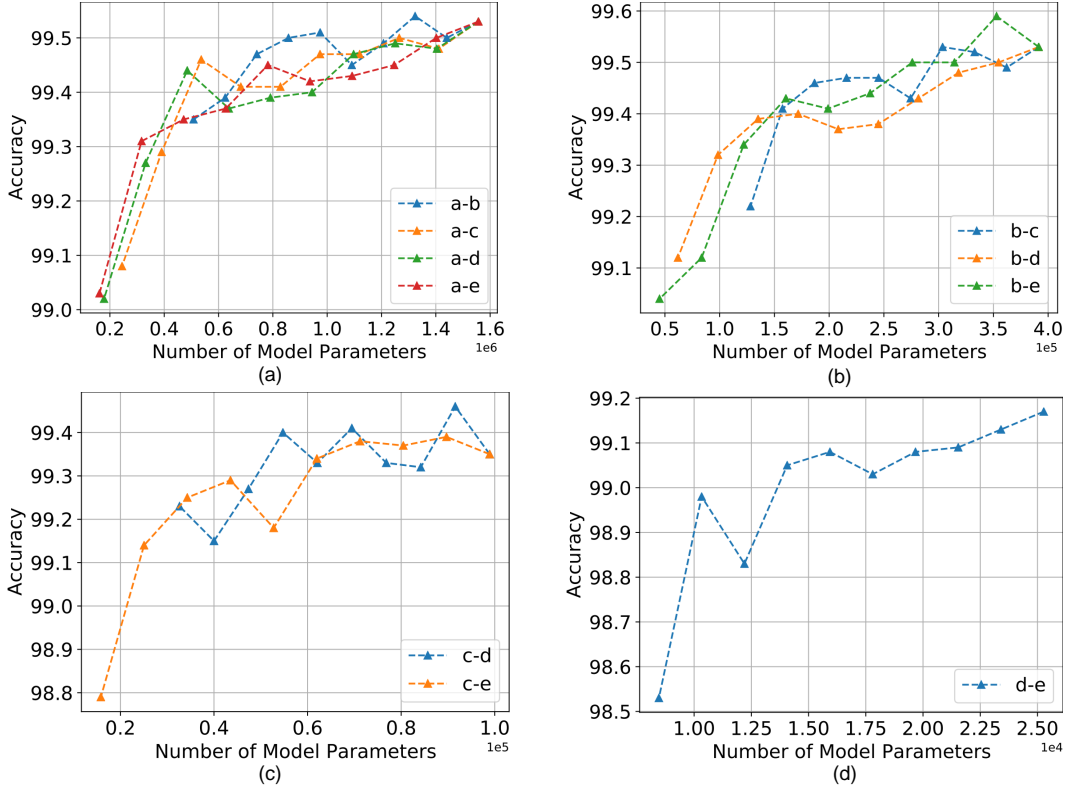

Figure 3: Interpolation experimental results for MNIST (IID) dataset between global model complexity ((a) a, (b) b, (c) c, (d) d) and various smaller model complexities.

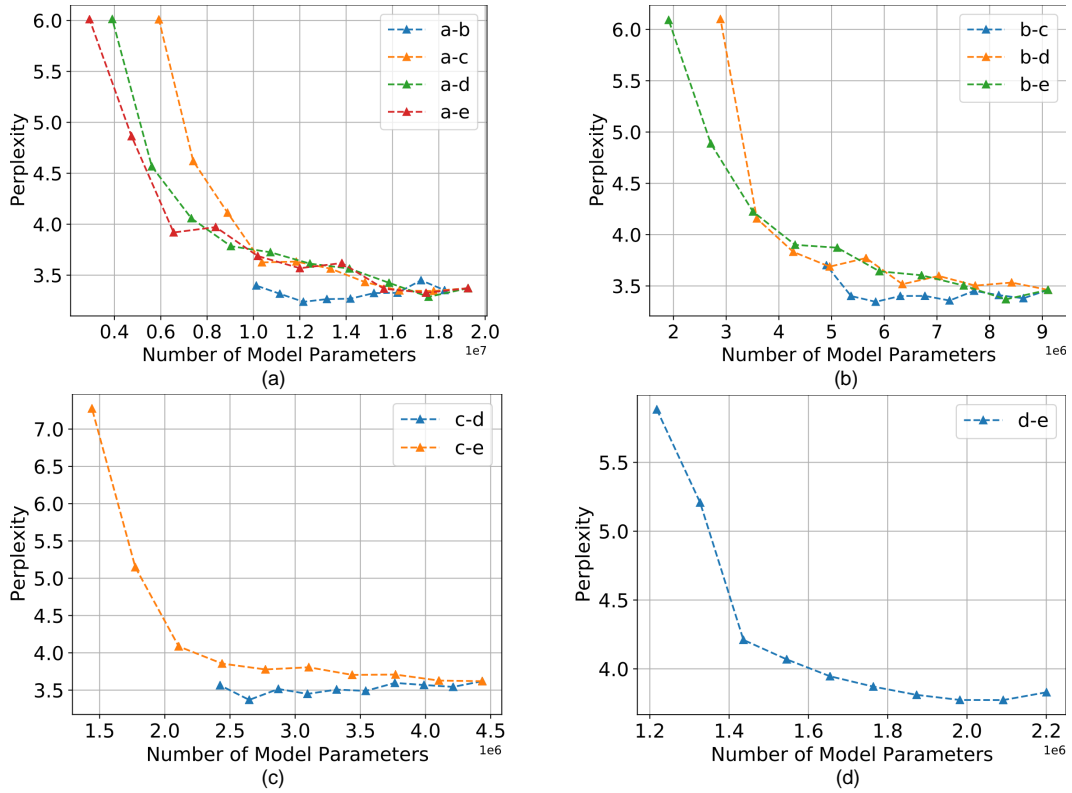

Figure 4: Interpolation experimental results for WikiText2 (IID) dataset between global model complexity ((a) a, (b) b, (c) c, (d) d) and various smaller model complexities.

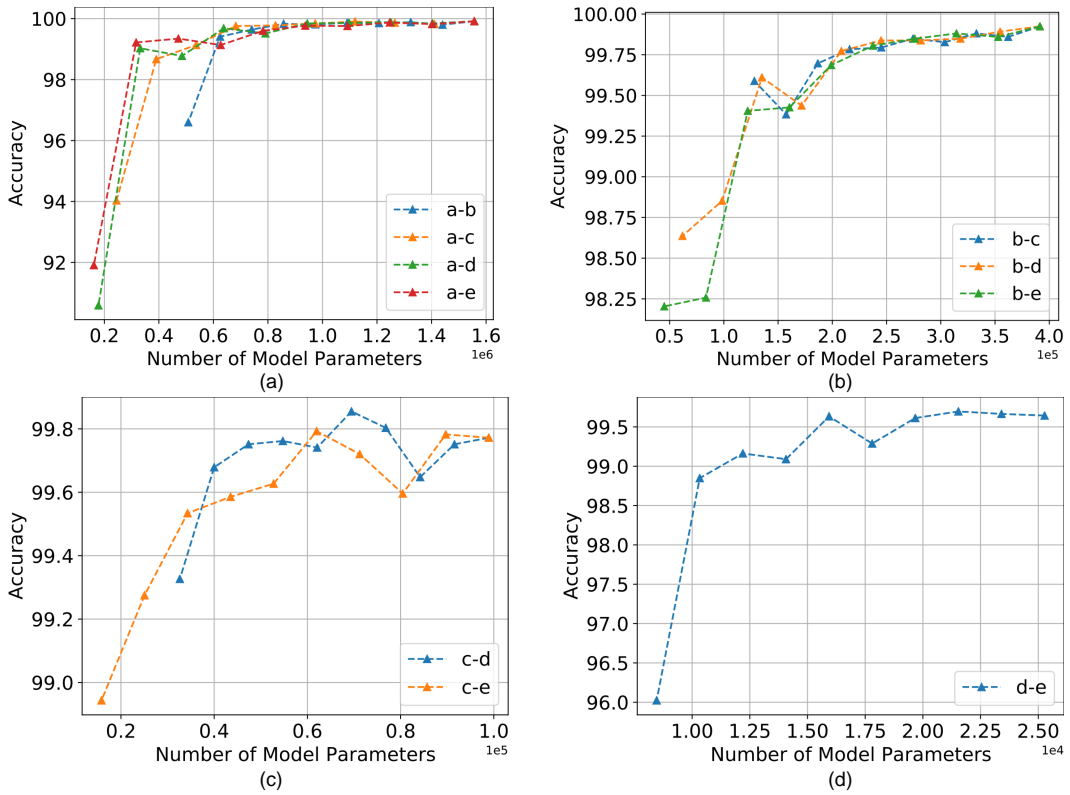

Figure 5: Interpolation experimental results for MNIST (non-IID, Local) dataset between global model complexity ((a) a, (b) b, (c) c, (d) d) and various smaller model complexities.

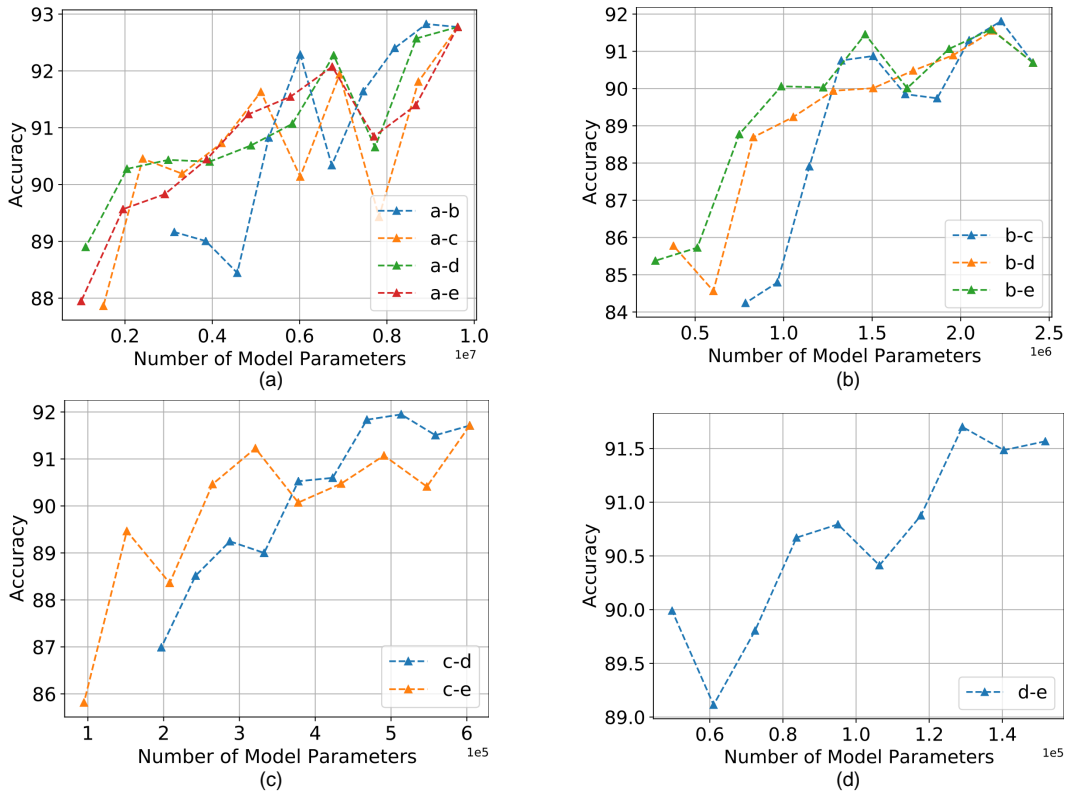

Figure 6: Interpolation experimental results for CIFAR10 (non-IID, Local) dataset between global model complexity ((a) a, (b) b, (c) c, (d) d) and various smaller model complexities.

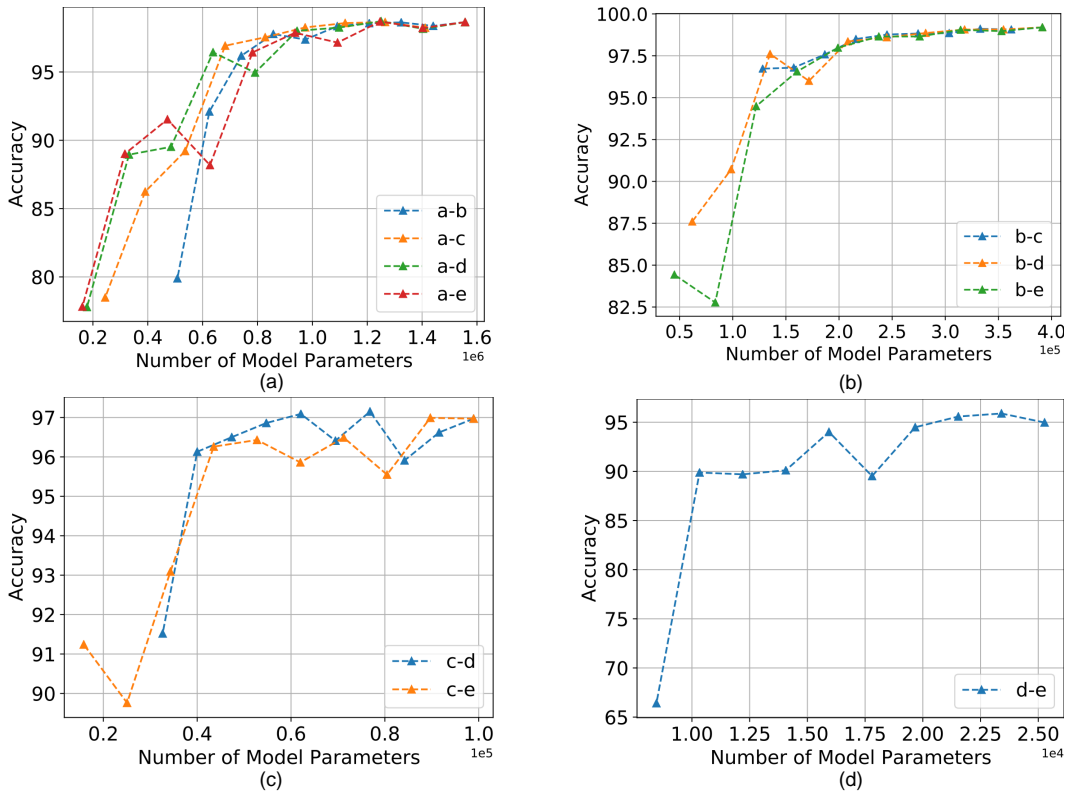

Figure 7: Interpolation experimental results for MNIST (non-IID, Global) dataset between global model complexity ((a) a, (b) b, (c) c, (d) d) and various smaller model complexities.

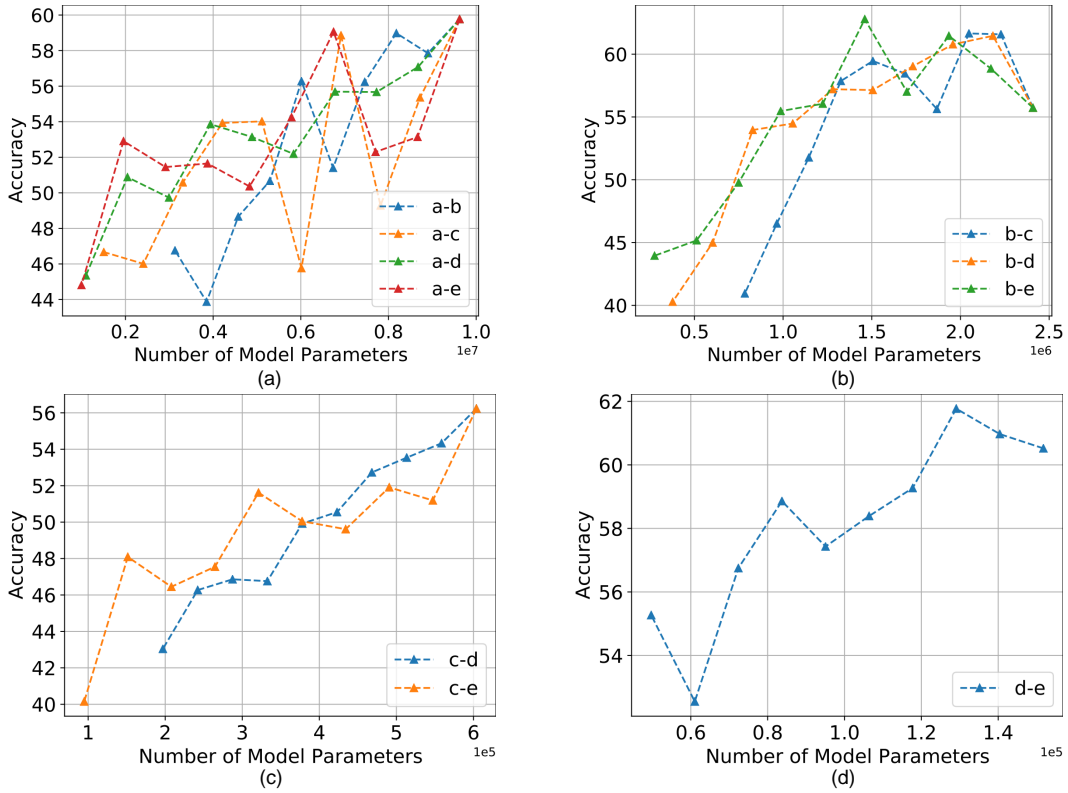

Figure 8: Interpolation experimental results for CIFAR10 (non-IID, Global) dataset between global model complexity ((a) a, (b) b, (c) c, (d) d) and various smaller model complexities.

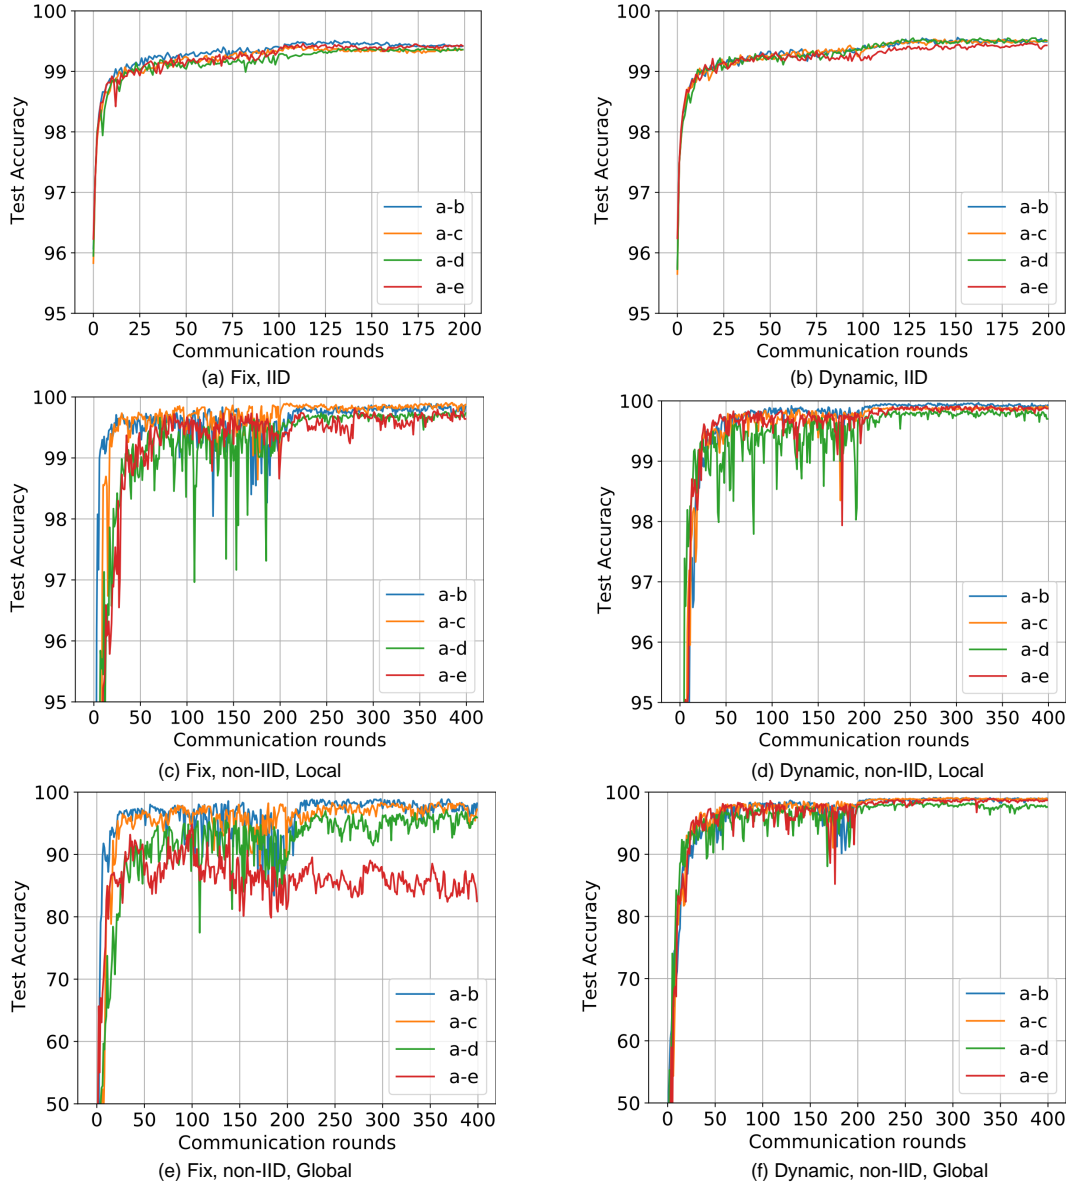

Figure 9: Learning curves of MNIST datasets with 50% Fix and Dynamic computation complexity assignments.

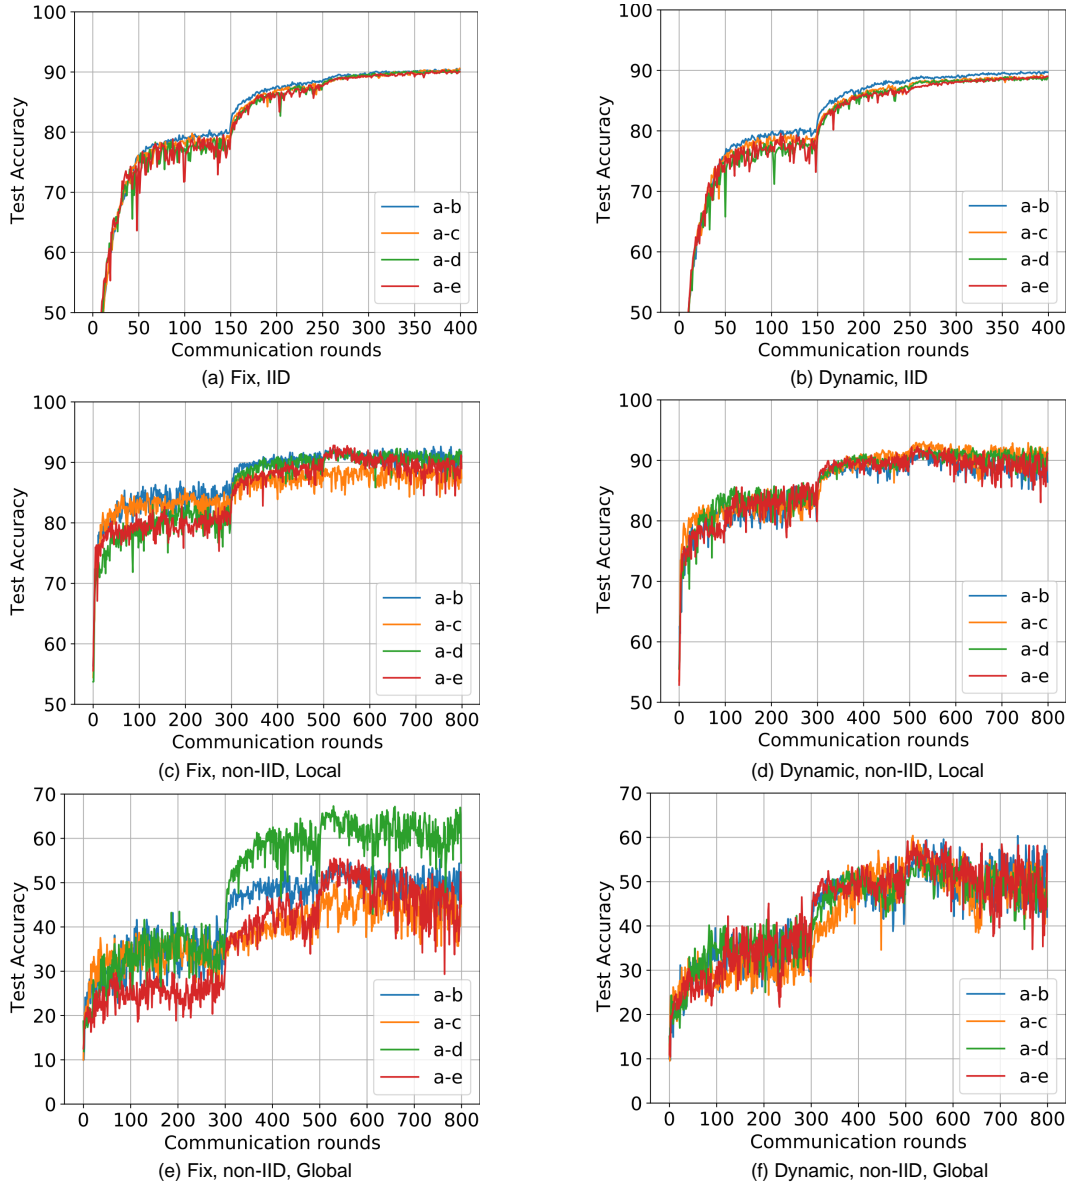

Figure 10: Learning curves of CIFAR10 datasets with 50% Fix and Dynamic computation complexity assignments.

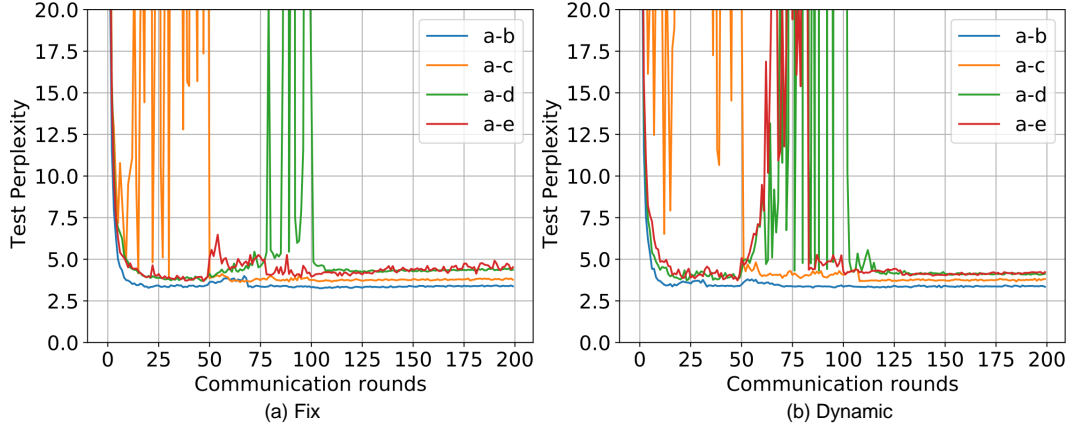

Figure 11: Learning curves of WikiText2 datasets with 50% Fix and Dynamic computation complexity assignments.

| Model                           | Ratio | Parameters | FLOPs   | Space (MB) | Accuracy |         |        |
|---------------------------------|-------|------------|---------|------------|----------|---------|--------|
|                                 |       |            |         |            | IID      | Non-IID |        |
|                                 |       |            |         |            |          | Local   | Global |
| a                               | 1.00  | 1.6 M      | 80.5 M  | 5.94       | 99.53    | 99.85   | 98.92  |
| a-b                             | 0.63  | 974.1 K    | 50.5 M  | 3.72       | 99.54    | 99.96   | 99.10  |
| a-c                             | 0.53  | 827.9 K    | 42.9 M  | 3.16       | 99.52    | 99.89   | 99.12  |
| a-d                             | 0.51  | 791.1 K    | 41.0 M  | 3.02       | 99.54    | 99.81   | 98.37  |
| a-e                             | 0.50  | 781.7 K    | 40.5 M  | 2.98       | 99.46    | 99.89   | 98.96  |
| a-b-c                           | 0.44  | 682.4 K    | 35.4 M  | 2.60       | 99.53    | 99.90   | 98.72  |
| a-b-d                           | 0.42  | 657.8 K    | 34.1 M  | 2.51       | 99.52    | 99.78   | 98.02  |
| a-b-e                           | 0.42  | 651.6 K    | 33.8 M  | 2.49       | 99.54    | 99.95   | 98.92  |
| a-c-d                           | 0.36  | 560.4 K    | 29.1 M  | 2.14       | 99.57    | 99.95   | 99.34  |
| a-c-e                           | 0.36  | 554.1 K    | 28.7 M  | 2.11       | 99.52    | 99.94   | 98.43  |
| a-d-e                           | 0.34  | 529.6 K    | 27.4 M  | 2.02       | 99.57    | 99.80   | 98.92  |
| a-b-c-d                         | 0.33  | 518.1 K    | 26.9 M  | 1.98       | 99.54    | 99.80   | 99.03  |
| a-b-c-e                         | 0.33  | 513.4 K    | 26.7 M  | 1.96       | 99.46    | 99.69   | 97.53  |
| a-b-d-e                         | 0.32  | 495.0 K    | 25.7 M  | 1.89       | 99.49    | 99.85   | 98.66  |
| a-c-d-e                         | 0.27  | 421.9 K    | 21.9 M  | 1.61       | 99.54    | 99.84   | 98.80  |
| a-b-c-d-e                       | 0.27  | 415.8 K    | 21.6 M  | 1.59       | 99.46    | 99.85   | 98.29  |
| b                               | 1.00  | 391.4 K    | 20.5 M  | 1.49       | 99.53    | 99.87   | 99.10  |
| b-c                             | 0.63  | 245.1 K    | 12.9 M  | 0.94       | 99.49    | 99.87   | 99.05  |
| b-d                             | 0.53  | 208.3 K    | 11.0 M  | 0.79       | 99.44    | 99.85   | 98.95  |
| b-e                             | 0.51  | 199.0 K    | 10.4 M  | 0.76       | 99.51    | 99.67   | 98.51  |
| b-c-d                           | 0.44  | 171.9 K    | 9.1 M   | 0.66       | 99.54    | 99.84   | 98.98  |
| b-c-e                           | 0.42  | 165.6 K    | 8.7 M   | 0.63       | 99.51    | 99.85   | 98.20  |
| b-d-e                           | 0.36  | 141.1 K    | 7.4 M   | 0.54       | 99.48    | 99.89   | 98.72  |
| b-c-d-e                         | 0.33  | 130.5 K    | 6.9 M   | 0.50       | 99.52    | 99.88   | 98.99  |
| c                               | 1.00  | 98.9 K     | 5.3 M   | 0.38       | 99.35    | 99.56   | 96.34  |
| c-d                             | 0.63  | 62.1 K     | 3.4 M   | 0.24       | 99.38    | 99.92   | 99.05  |
| c-e                             | 0.53  | 52.8 K     | 2.9 M   | 0.20       | 99.39    | 99.79   | 97.27  |
| c-d-e                           | 0.44  | 43.6 K     | 2.4 M   | 0.17       | 99.31    | 99.76   | 97.85  |
| d                               | 1.00  | 25.3 K     | 1.4 M   | 0.10       | 99.17    | 99.86   | 97.86  |
| d-e                             | 0.63  | 15.9 K     | 909.5 K | 0.06       | 99.19    | 99.63   | 97.70  |
| e                               | 1.00  | 6.6 K      | 400.5 K | 0.03       | 98.66    | 99.07   | 92.84  |
| Standalone (Liang et al., 2020) | 1.00  | 633.2 K    | 1.3 M   | 2.42       | 86.24    | 98.72   | 30.41  |
| FedAvg (Liang et al., 2020)     | 1.00  | 633.2 K    | 1.3 M   | 2.42       | 97.93    | 98.20   | 98.20  |
| LG-FedAvg (Liang et al., 2020)  | 1.00  | 633.2 K    | 1.3 M   | 2.42       | 97.93    | 98.54   | 98.17  |

Table 7: Results of combination of various computation complexity levels for MNIST dataset.

| Model                           | Ratio | Parameters | FLOPs   | Space (MB) | Accuracy |         |        |
|---------------------------------|-------|------------|---------|------------|----------|---------|--------|
|                                 |       |            |         |            | IID      | Non-IID |        |
|                                 |       |            |         |            |          | Local   | Global |
| a                               | 1.00  | 9.6 M      | 330.2 M | 36.71      | 91.19    | 92.38   | 56.88  |
| a-b                             | 0.63  | 6.0 M      | 206.8 M | 22.95      | 90.60    | 91.35   | 59.93  |
| a-c                             | 0.53  | 5.1 M      | 175.7 M | 19.50      | 90.59    | 92.83   | 60.25  |
| a-d                             | 0.51  | 4.9 M      | 167.9 M | 18.64      | 90.28    | 91.78   | 56.54  |
| a-e                             | 0.50  | 4.8 M      | 165.9 M | 18.43      | 90.29    | 92.10   | 59.11  |
| a-b-c                           | 0.44  | 4.2 M      | 144.9 M | 16.07      | 89.70    | 90.41   | 54.16  |
| a-b-d                           | 0.42  | 4.1 M      | 139.7 M | 15.49      | 89.98    | 90.29   | 51.79  |
| a-b-e                           | 0.42  | 4.0 M      | 138.4 M | 15.35      | 89.79    | 90.79   | 62.17  |
| a-c-d                           | 0.36  | 3.5 M      | 119.0 M | 13.20      | 89.47    | 89.82   | 53.13  |
| a-c-e                           | 0.36  | 3.4 M      | 117.6 M | 13.05      | 89.35    | 93.59   | 57.30  |
| a-d-e                           | 0.34  | 3.3 M      | 112.4 M | 12.48      | 88.75    | 91.11   | 56.74  |
| a-b-c-d                         | 0.33  | 3.2 M      | 110.1 M | 12.19      | 89.33    | 91.32   | 54.50  |
| a-b-c-e                         | 0.33  | 3.2 M      | 109.1 M | 12.09      | 89.37    | 92.52   | 61.56  |
| a-b-d-e                         | 0.32  | 3.1 M      | 105.1 M | 11.65      | 89.40    | 91.80   | 56.78  |
| a-c-d-e                         | 0.27  | 2.6 M      | 89.6 M  | 9.93       | 88.42    | 91.50   | 62.15  |
| a-b-c-d-e                       | 0.27  | 2.6 M      | 88.4 M  | 9.78       | 88.83    | 92.49   | 61.64  |
| b                               | 1.00  | 2.4 M      | 83.3 M  | 9.19       | 89.82    | 93.83   | 55.45  |
| b-c                             | 0.63  | 1.5 M      | 52.3 M  | 5.75       | 89.00    | 89.96   | 52.29  |
| b-d                             | 0.53  | 1.3 M      | 44.4 M  | 4.88       | 89.18    | 91.78   | 51.07  |
| b-e                             | 0.51  | 1.2 M      | 42.4 M  | 4.67       | 89.10    | 90.68   | 59.81  |
| b-c-d                           | 0.44  | 1.1 M      | 36.7 M  | 4.02       | 88.35    | 92.79   | 58.09  |
| b-c-e                           | 0.42  | 1.0 M      | 35.3 M  | 3.88       | 87.98    | 91.98   | 58.28  |
| b-d-e                           | 0.36  | 866.3 K    | 30.1 M  | 3.30       | 88.06    | 91.94   | 54.02  |
| b-c-d-e                         | 0.33  | 800.7 K    | 27.9 M  | 3.05       | 87.92    | 91.90   | 59.10  |
| c                               | 1.00  | 603.8 K    | 21.2 M  | 2.30       | 87.55    | 91.09   | 55.12  |
| c-d                             | 0.63  | 377.8 K    | 13.4 M  | 1.44       | 86.75    | 91.58   | 54.61  |
| c-e                             | 0.53  | 321.1 K    | 11.3 M  | 1.22       | 86.88    | 91.83   | 63.47  |
| c-d-e                           | 0.44  | 264.6 K    | 9.4 M   | 1.01       | 85.79    | 91.49   | 55.42  |
| d                               | 1.00  | 151.8 K    | 5.5 M   | 0.58       | 84.21    | 90.77   | 61.13  |
| d-e                             | 0.63  | 95.1 K     | 3.5 M   | 0.36       | 82.93    | 90.89   | 56.16  |
| e                               | 1.00  | 38.4 K     | 1.5 M   | 0.15       | 77.09    | 89.62   | 54.16  |
| Standalone (Liang et al., 2020) | 1.00  | 1.8 M      | 3.6 M   | 6.88       | 16.90    | 87.93   | 10.03  |
| FedAvg (Liang et al., 2020)     | 1.00  | 1.8 M      | 3.6 M   | 6.88       | 67.74    | 58.99   | 58.99  |
| LG-FedAvg (Liang et al., 2020)  | 1.00  | 1.8 M      | 3.6 M   | 6.88       | 69.76    | 91.77   | 60.79  |

Table 8: Results of combination of various computation complexity levels for CIFAR10 dataset.

| Model     | Ratio | Parameters | FLOPs   | Space (MB) | Perplexity |
|-----------|-------|------------|---------|------------|------------|
| a         | 1.00  | 19.3 M     | 1.4 B   | 73.49      | 3.37       |
| a-b       | 0.74  | 14.2 M     | 991.4 M | 54.12      | 3.31       |
| a-c       | 0.62  | 11.8 M     | 829.0 M | 45.20      | 3.71       |
| a-b-c     | 0.57  | 10.9 M     | 757.6 M | 41.72      | 3.42       |
| a-d       | 0.56  | 10.7 M     | 754.3 M | 40.94      | 3.74       |
| a-b-d     | 0.53  | 10.2 M     | 707.8 M | 38.87      | 3.53       |
| a-e       | 0.53  | 10.2 M     | 718.6 M | 38.86      | 3.75       |
| a-b-e     | 0.51  | 9.8 M      | 684.0 M | 37.49      | 3.47       |
| b         | 1.00  | 9.1 M      | 614.8 M | 34.74      | 3.46       |
| a-b-c-d   | 0.45  | 8.8 M      | 603.4 M | 33.39      | 3.61       |
| a-c-d     | 0.45  | 8.6 M      | 599.6 M | 32.93      | 4.08       |
| a-b-c-e   | 0.44  | 8.5 M      | 585.5 M | 32.34      | 3.50       |
| a-c-e     | 0.43  | 8.3 M      | 575.8 M | 31.54      | 3.65       |
| a-b-d-e   | 0.41  | 7.9 M      | 548.2 M | 30.21      | 3.64       |
| a-d-e     | 0.39  | 7.5 M      | 526.0 M | 28.70      | 4.02       |
| a-b-c-d-e | 0.37  | 7.2 M      | 496.6 M | 27.55      | 3.55       |
| b-c       | 0.74  | 6.8 M      | 452.4 M | 25.83      | 3.45       |
| a-c-d-e   | 0.35  | 6.8 M      | 467.0 M | 25.76      | 3.92       |
| b-d       | 0.62  | 5.7 M      | 377.7 M | 21.57      | 3.70       |
| b-c-d     | 0.58  | 5.2 M      | 348.5 M | 20.02      | 3.47       |
| b-e       | 0.56  | 5.1 M      | 342.0 M | 19.49      | 3.90       |
| b-c-e     | 0.54  | 4.9 M      | 324.7 M | 18.63      | 3.46       |
| c         | 1.00  | 4.4 M      | 290.1 M | 16.92      | 3.62       |
| b-c-d-e   | 0.46  | 4.2 M      | 278.7 M | 16.07      | 3.64       |
| b-d-e     | 0.45  | 4.1 M      | 274.9 M | 15.79      | 3.92       |
| c-d       | 0.75  | 3.3 M      | 215.4 M | 12.66      | 3.46       |
| c-e       | 0.62  | 2.8 M      | 179.7 M | 10.57      | 3.89       |
| c-d-e     | 0.58  | 2.6 M      | 166.7 M | 9.85       | 3.66       |
| d         | 1.00  | 2.2 M      | 140.7 M | 8.39       | 3.83       |
| d-e       | 0.75  | 1.7 M      | 105.0 M | 6.31       | 3.90       |
| e         | 1.00  | 1.1 M      | 69.3 M  | 4.23       | 7.41       |

Table 9: Results of combination of various computation complexity levels for WikiText2 dataset.
